# Supplementary material for: Anthocyanins from black wolfberry (Lycium ruthenicum Murr.) prevent inflammation and increase fecal fatty acid in diet-induced obese rats
Source: Royal Society of Chemistry journal article supplement (doi:10.1039/c7ra09846d), 2017-01-01
Supplement: c7ra09846d1.pdf [file c7ra09846d1.pdf]

***Supplementary Figure 1***

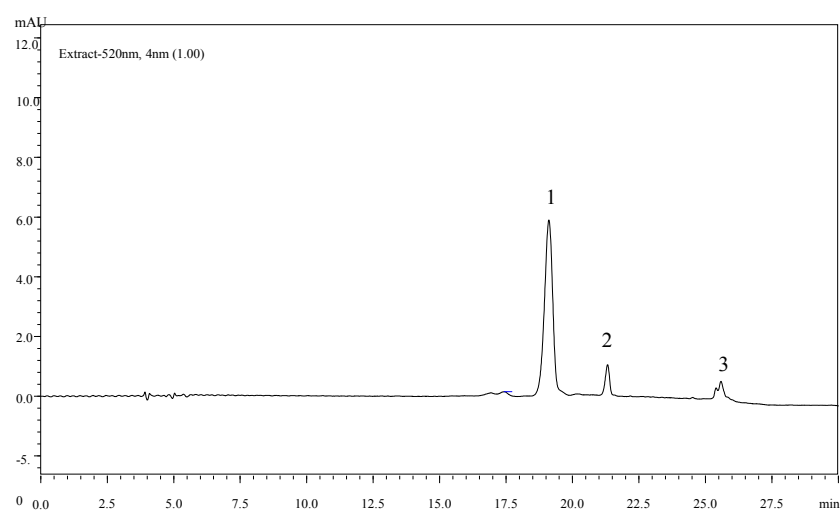

Supplementary Figure 1 HPLC results of black wolfberry anthocyanin

***Supplementary Table 1***

Supplementary Table 1 MS data of black wolfberry anthocyanin

| Peak | [M <sup>+</sup> ] m/z | MS <sup>2</sup> m/z | Anthocyanins composition             |
|------|-----------------------|---------------------|--------------------------------------|
| 1    | 935                   | 771/641/479/317     | Petuinidi-3-rutinoside-5-glucosides  |
| 2    | 759                   | 641/479/317         | Petundin-3-glucoside-5-glucoside     |
| 3    | 921                   | 757/627/465/303     | Delphinidin-3-rutinoside-5-glucoside |
